# Supplementary material
Source: publisher site journal article supplement (https://www.dovepress.com/article/411096)
Supplement: Supplementary file 1 [file get_supplementary_file.php]

Appendix 1. The study protocol included a lesson plan (i.e., an online learning lesson plan, skills training lesson plan, skills testing, and an MCQ table of specifications).

**The study protocols**

(Translate of the protocol in the Thai language into the English language was performed)

**Definition**

- **Basic life support training for health care providers**: education strategies consisted of theoretical and practical training. The course consists of lessons in traditional BLS knowledge, video demonstrations of BLS skills, and instructor-led skill training. All participants train in simulated clinical scenarios and at learning stations. At the end of the course, trainees take a skills performance test and written examination.

**Study protocol**

- **BLS training under the contact restriction policy:** We built online learning using Google Classroom, which required an internet connection and took about 90 minutes to complete. The content consisted of lessons in BLS knowledge and a video demonstration of skills. Topics were high-quality resuscitation, the chain of survival, cardiac arrest evaluation, ventilation, compression, and automated external defibrillator (AED) use. A pre-course assessment with 20 randomized true/false questions resets every new attempt with unlimited attempts based on the learning objectives to encourage participation. A score of over 80% was required to complete the session. Skill training in groups of six participants. The training covered one rescuer resuscitation, rescue breathing, bag-mask ventilation, AED, and relief of choking for adults, children, and infants. Each participant was provided with sets of manikins (Little Anne QCPR®, Laerdal Medical, Norway), an AED trainer (Easyport trainer®, Schiller, Switzerland), and a bag-mask unit (Laerdal Medical, Norway) for participants to use.
- **Content in Google Classroom**
  - required an internet connection and about 90 minutes to complete.
  - The Knowledge about BLS concepts, the chain of survival, BLS steps, chest compression, airway and ventilation, automated external defibrillator, BLS in children and infants, team dynamics, relief of choking, first aid (text and picture)
  - VDO demonstration of BLS steps in adults, children, and infants
  - VDO demonstration of choking in adults, children, and infants
  - A pre-course assessment with 20 randomized true/false questions that resample every new attempt with unlimited attempts based on the learning objectives to encourage participation. A score of over 80% is required to complete the session.
- **Skills training**
  - bag-mask ventilation**,** chest compression, automated external defibrillator**,** one rescuer adult BLS, relief of choking
- **Outcome measurement (after the end of the training)**
  - Participants’ knowledge
    - We tested participants’ knowledge immediately after training using a 25-question multiple-choice test based on specific BLS guidelines by the learning objectives.
    - We tested participants’ three-month knowledge three months after training using a 25-question multiple-choice test based on specific BLS guidelines by the learning objectives. The test does not similar to immediate testing.
    - We tested participants’ six-month knowledge using a 25-question multiple-choice test based on specific BLS guidelines by the learning objectives. The test does not similar to immediate testing.
    - MCQ table of specifications (100 points):25 MCQ (4 choices) on BLS concepts (3 questions), the chain of survival (2 questions), BLS steps (5 questions), chest compression (3 questions), airway and ventilation (3 questions), automated external defibrillator (2 questions), BLS in children and infants (3 questions), relief of choking (2 questions), and first aid (2 questions)
    - We developed all MCQ tests based on AHA guideline and adjusted them for use in a Thai context. We conducted a pilot study and made the necessary modifications.
  - Participants’ overall course satisfaction
    - We evaluate immediately after testing using a five-point Likert-type scale (1. very dissatisfied, 2. dissatisfied, 3. neither satisfied nor dissatisfied, 4. satisfied, 5. very satisfied).
  - Participants’ skills: instructors directly observed participants’ management of a simulated unresponsive adult patient and evaluated their skills using a checklist. They will assess the management of patient consciousness, breathing and circulation, and AED use. Participants who perform all procedures correctly pass. Any participants who fail initially will repeat the test until they pass. We will blind instructors to students’ groups during the skill training and testing.
  - Incidences of COVID-19 infection among the participants were also recorded at two weeks.

**Adult CPR and AED Skills Testing**

**Student name [ ] (Place / in the box next to each step the student completes successfully)**

You are working in the clinic, and you see a person who has suddenly collapsed in the corridor. You check that the scene is safe, then approach the patient.

**Assessment and Activation**

[ ] Checks responsiveness [ ] Shouts for help/Activates EMS/Sends for AED

[ ] Checks breathing [ ] Checks pulse

**Once the student shouts for help, the instructor says, here is the bag mask. I am going to get the AED.**

**Cycle 1 of CPR Adult Compressions** [ ] Performs high-quality compression

( ) hand placement on the lower half of the sternum ( ) 30 compressions in 15-18 seconds

( ) complete recoil after each compression ( ) compresses at least 5 cm **Adult Breaths** [ ]Gives two breaths with a bag-mask unit

( ) each breath has provided over 1 second ( ) visible chest rise with each breath

( ) resumes compressions in less than 10 seconds

**Cycle 2 of CPR Adult Compressions** [ ] Performs high-quality compression

( ) hand placement on the lower half of the sternum ( ) 30 compressions in 15-18 seconds

( ) complete recoil after each compression ( ) compresses at least 5 cm **Adult Breaths** [ ]Gives two breaths with a bag-mask unit

( ) each breath has provided over 1 second ( ) visible chest rise with each breath

( ) resumes compressions in less than 10 seconds

**Rescuer 2 says Here is the AED. I will take over compressions, and you will use the AED.**

**AED** [ ] Powers on AED [ ] Correctly attaches pads [ ] Clears for analysis

[ ] Clears to safely deliver a shock [ ] Safely delivers a shock

**Resumes Compressions** [ ] Compressions are resumed immediately after shock delivery

**Test result** First attempt [ ] pass [ ] needs remediation

Second attempt [ ] pass [ ] needs remediation

Third attempt [ ] pass [ ] needs remediation
